# Supplementary material for: lncRNAs in Non-Malignant Tissue Have Prognostic Value in Colorectal Cancer
Source: MDPI journal article supplement (doi:10.3390/ijms19092672), 2018-09-08
Supplement: s1 [file s1]

**Table S1.** List of all tested lncRNAs and their reported function in cancer.

| lncRNA (abbr.) | lncRNA Full Name                                       | Function                                                                           | References |
|----------------|--------------------------------------------------------|------------------------------------------------------------------------------------|------------|
| CCAT1          | Colon Cancer Associated Transcript 1                   | Promoter of cell proliferation                                                     | [16]       |
| Linc-ROR       | Regulator of Reprogramming                             | Negative regulator of p53                                                          | [18]       |
| MIR155HG       | MIR155 Host Gene                                       | Primary RNA of miR-155                                                             | [19]       |
| TUG1           | Taurine Up-Regulated 1                                 | Promotes metastasis via EMT                                                        | [11]       |
| GAS5           | Growth arrest specific 5                               | Cell proliferation, promotes metastasis                                            | [10]       |
| MALAT1         | metastasis associated lung adenocarcinoma transcript 1 | Promotes proliferation and metastasis; chemotherapy resistance and response marker | [15,20]    |
| SPRY4-IT1      | Sprouty homolog 4 intronic transcript 1                | Promotes proliferation and invasion                                                | [39]       |
| PCAT1          | Prostate Cancer Associated Transcript 1                | Cell proliferation, apoptosis                                                      | [8]        |
| ANRIL          | antisense noncoding RNA in the INK4 locus              | Cell migration and invasion (in vitro)                                             | [17]       |

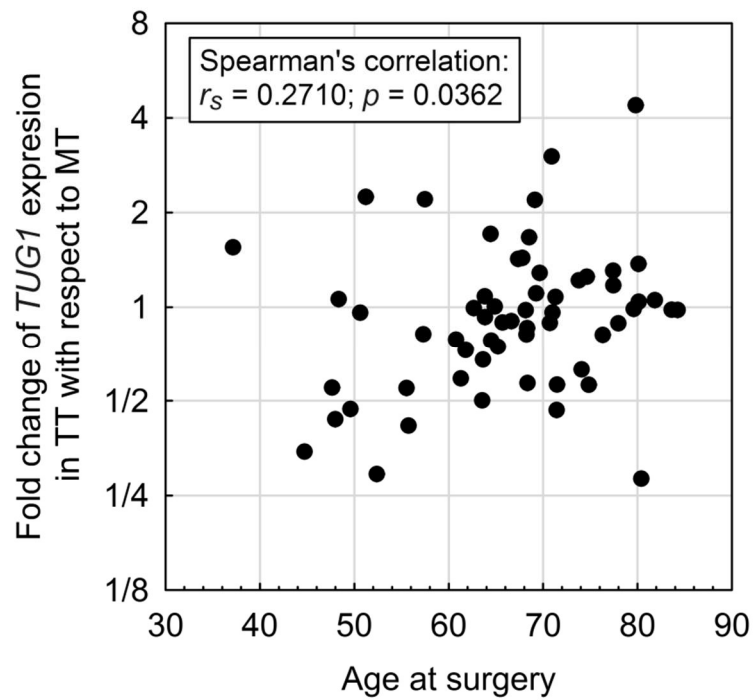

**Figure S1.** Correlation between differential expression of *TUG1* with age. Displayed is the association between patient age and differential expression of *TUG1*. With rising age, the fold-change of *TUG1* is more likely to rise as well.

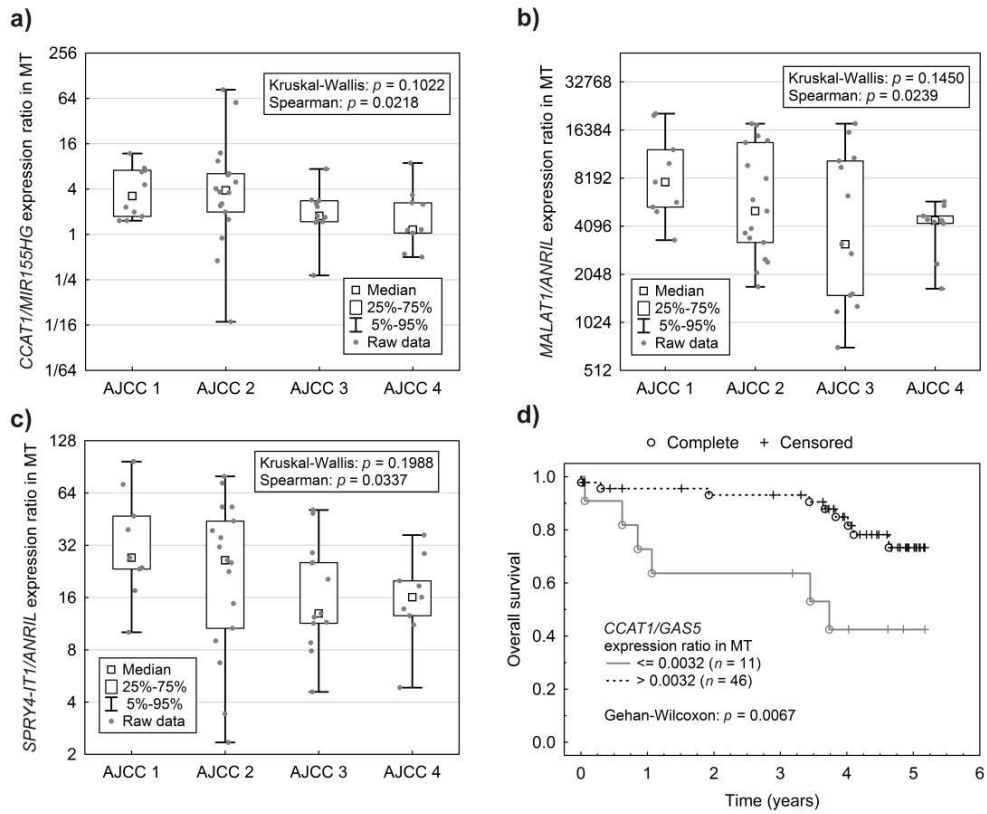

**Figure S2.** Association of lncRNA ratios with AJCC stage and OS. (a) Diagrammed is the association between the expression ratio of *CCAT1/MIR155HG* and AJCC stage. The ratio is likely to decline with rising AJCC stage; (b) The expression ratio of *MALAT1/ANRIL* is associated with AJCC stage and likely to decline with rising AJCC stage; (c) The expression ratio of *SPRY4-IT1/ANRIL* is associated to AJCC stage and is likely to be reduced in higher AJCC stages; (d) Optimized Kaplan-Meier curve for the expression ratio of *CCAT1/GAS5* showing its association with overall survival (OS).
